# Supplementary material for: Risk-based regionalization approach for area-wide management of HLB vectors in the Mediterranean Basin
Source: Frontiers journal article supplement (doi:10.3389/fpls.2023.1256935), 2023-12-04
Supplement: Data_Sheet_2.PDF [file Data_Sheet_2.PDF]

## Supplementary Material B. Pest Management Areas (PMAs) descriptive

### 1 SUPPLEMENTARY FIGURES

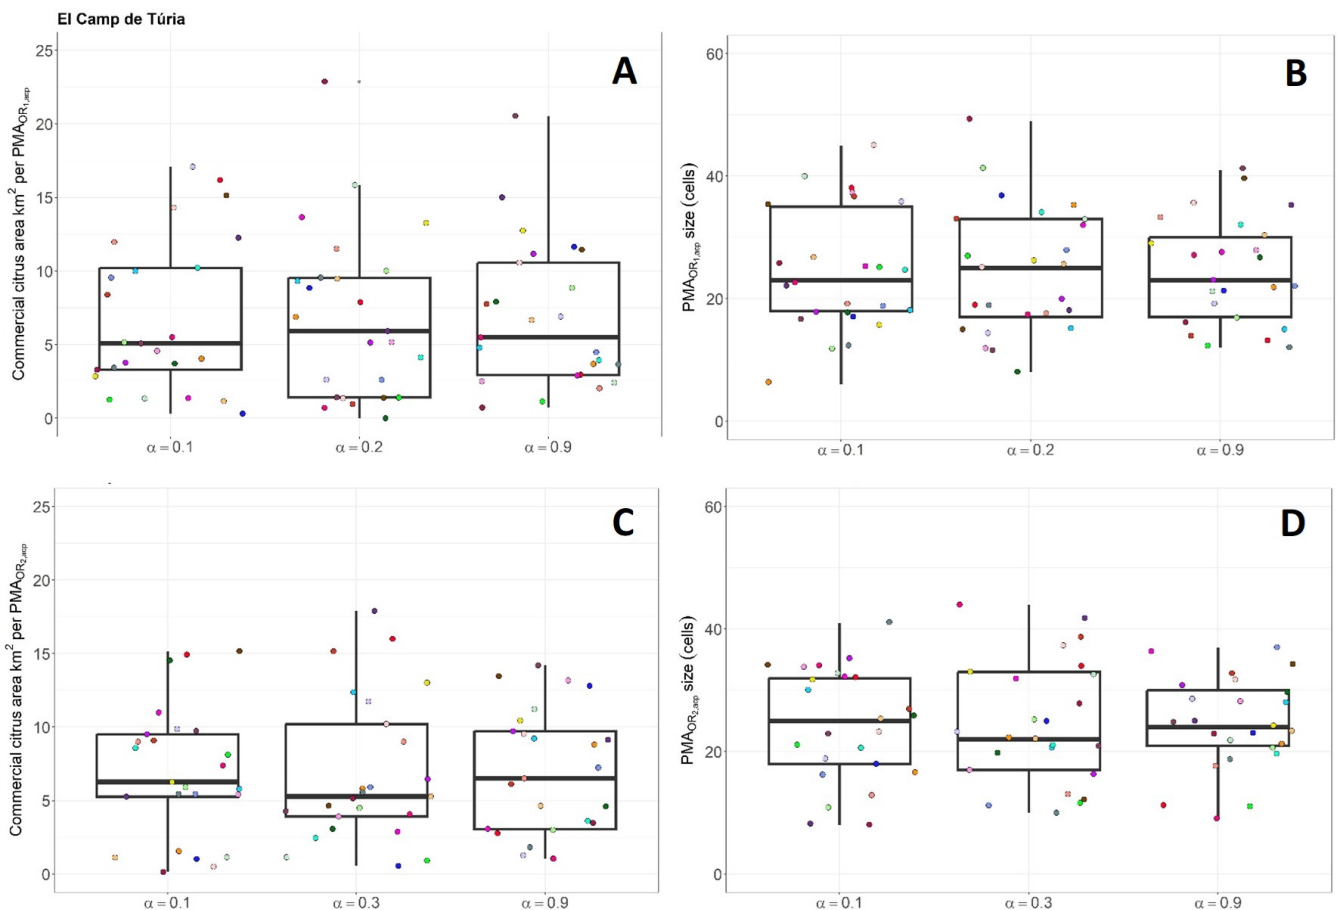

Figure SB1: Individual and overall distribution of the commercial citrus area (km<sup>2</sup>) and number of cells in PMAs<sub>OR1,acp</sub> (A,B) and PMAs<sub>OR2,acp</sub> (C,D) in "El Camp de Túria" county. Box-and-whisker plots for A–D: central line represents the median value; box limits represents the first ( $Q_1$ ) and third ( $Q_3$ ) quantiles; upper whisker represents  $\min(\max(x), Q_3 + 1.5IQR)$ ; lower whisker represents  $\max(\min(x), Q_1 - 1.5IQR)$ ;  $IQR = Q_3 - Q_1$ ; outliers are represented by dots.

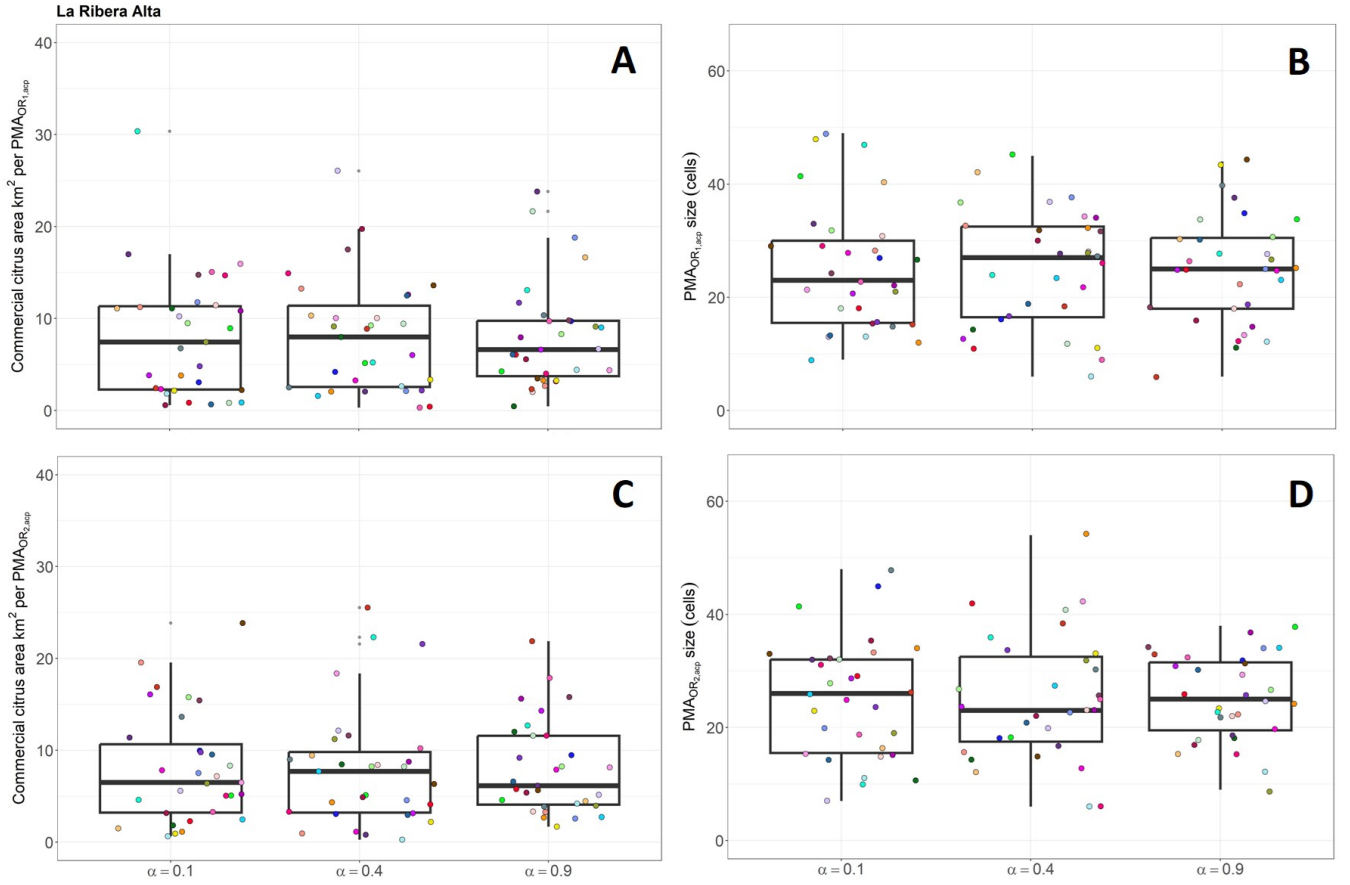

Figure SB2: Individual and overall distribution of the commercial citrus area (km<sup>2</sup>) and number of cells in PMA<sub>OR1,acp</sub> (A,B) and PMA<sub>OR2,acp</sub> (C,D) in “La Ribera Alta” county. Box-and-whisker plots for A–D: central line represents the median value; box limits represents the first ( $Q_1$ ) and third ( $Q_3$ ) quantiles; upper whisker represents  $\min(\max(x), Q_3 + 1.5IQR)$ ; lower whisker represents  $\max(\min(x), Q_1 - 1.5IQR)$ ;  $IQR = Q_3 - Q_1$ ; outliers are represented by dots.

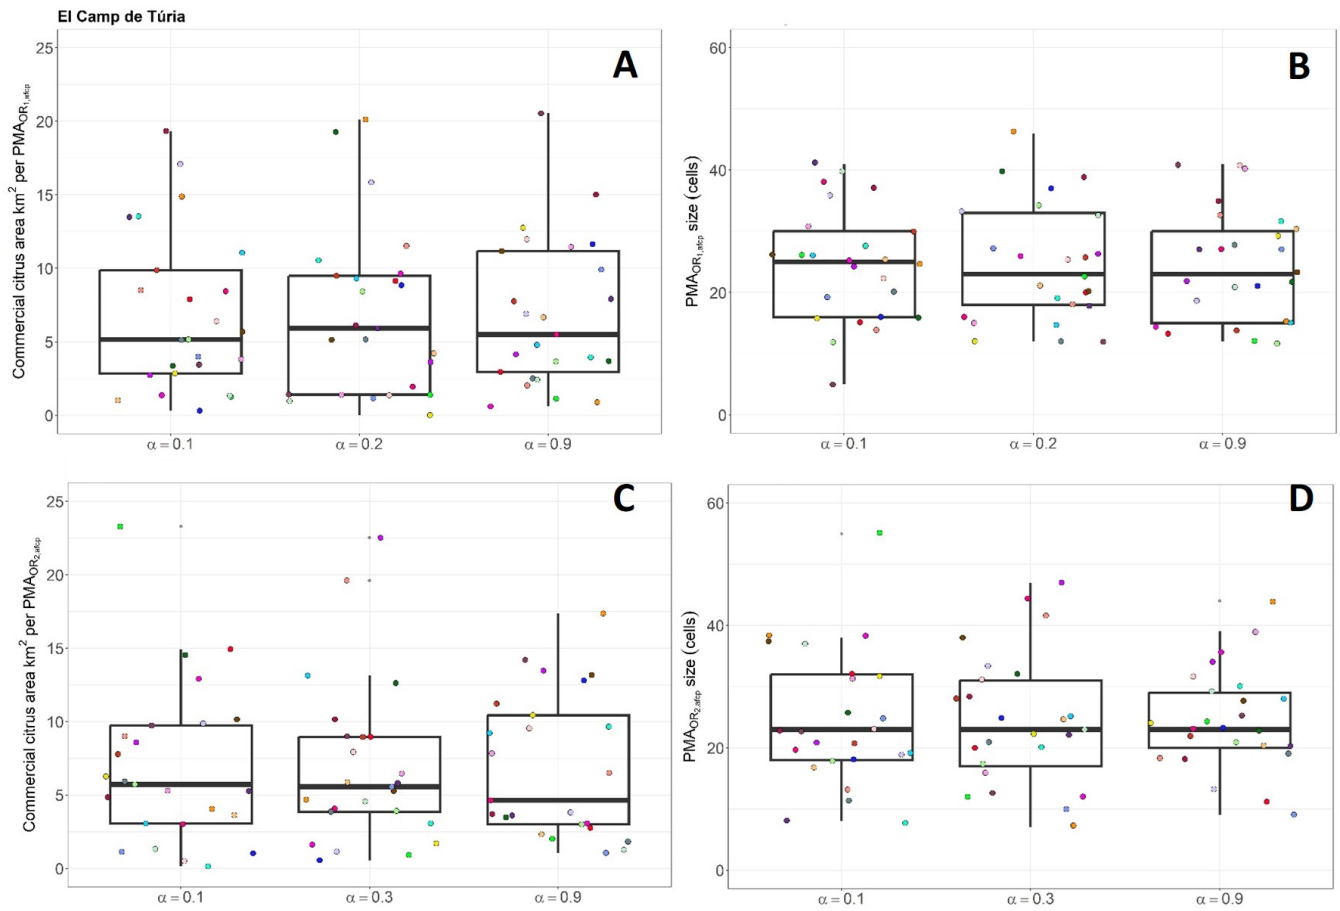

Figure SB3: Individual and overall distribution of the commercial citrus area (km<sup>2</sup>) and number of cells in PMA<sub>OR<sub>1</sub>,afcp</sub> (A,B) and PMA<sub>OR<sub>2</sub>,afcp</sub> (C,D) in "El Camp de Túria" county. Box-and-whisker plots for A–D: central line represents the median value; box limits represents the first ( $Q_1$ ) and third ( $Q_3$ ) quantiles; upper whisker represents  $\min(\max(x), Q_3 + 1.5IQR)$ ; lower whisker represents  $\max(\min(x), Q_1 - 1.5IQR)$ ;  $IQR = Q_3 - Q_1$ ; outliers are represented by dots.

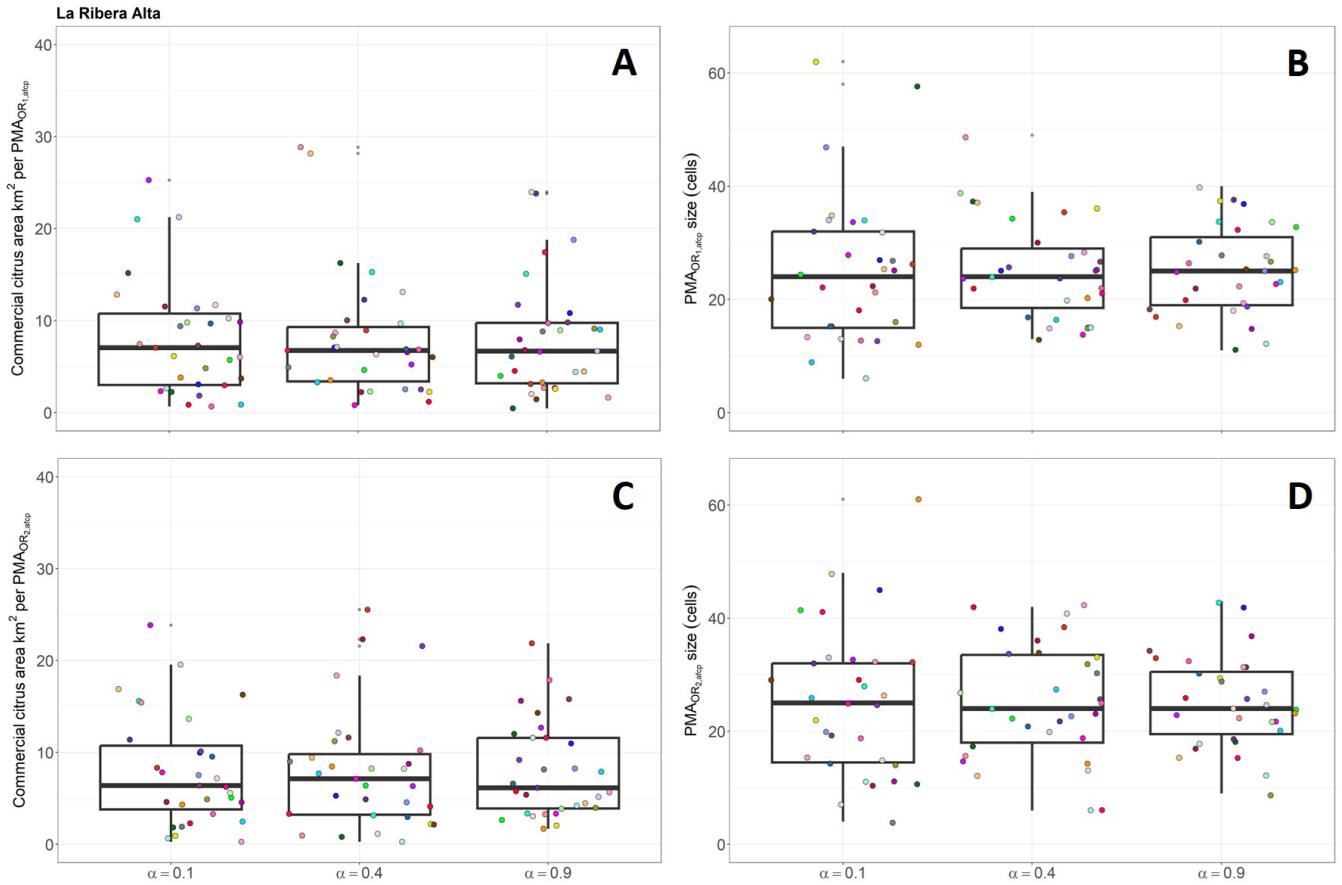

Figure SB4: Individual and overall distribution of the commercial citrus area ( $\text{km}^2$ ) and number of cells in  $\text{PMAs}_{OR1,afcp}$  (A,B) and  $\text{PMAs}_{OR2,afcp}$  (C,D) in “La Ribera Alta” county. Box-and-whisker plots for A–D: central line represents the median value; box limits represents the first ( $Q_1$ ) and third ( $Q_3$ ) quantiles; upper whisker represents  $\min(\max(x), Q_3 + 1.5IQR)$ ; lower whisker represents  $\max(\min(x), Q_1 - 1.5IQR)$ ;  $IQR = Q_3 - Q_1$ ; outliers are represented by dots.

## ACKNOWLEDGMENTS

We thank César Monzó (IVIA), Aranzazu Moreno and Alberto Fereres (IAS-CSIC), Amílcar Duarte, Tomás Magalhães and Rita Poeria (Univ. Algarve), Jacinto Benhadi (Inst. P. Bragança), Silvio Lopes (Fundecitrus) and Alessandra Gentile (Univ. Catania) for their time, their knowledge and for a great deal of helpful, well-documented information about *D. citri* and *T. erytraeae*. We would also like to thank all of them for their useful comments about the possible climatic requirements of the vectors in our study area.
